# Supplementary material for: Redirection of Metabolic Hydrogen by Inhibiting Methanogenesis in the Rumen Simulation Technique (RUSITEC)
Source: Front Microbiol. 2017 Mar 14;8:393. doi: 10.3389/fmicb.2017.00393 (PMC5349286; doi:10.3389/fmicb.2017.00393)
Supplement: Supplementary file 1 [file Table1.docx]

**Supplementary Material**

Table 1: Correlation matrix between rumen fermentation variables affected by methane inhibitors using a rumen simulation technique. Statistical levels were adjusted with the false discovery rate option.

| Item1 | Dissolved H2 (μM) | Total gas (mL/d) | CH4 (mL/d) | H2 (mL/d) | CO2 (mL/d) | N2O (mL/d) | dOM (%) | EMPS2 | Total VFA (mM) | Acetate (mM) | Propionate (mM) |
| --- | --- | --- | --- | --- | --- | --- | --- | --- | --- | --- | --- |
| Total gas (mL/d) | -0.295 |  |  |  |  |  |  |  |  |  |  |
| CH4 (mL/d) | -0.195 | 0.506* |  |  |  |  |  |  |  |  |  |
| H2 (mL/d) | -0.232 | 0.123 | -0.215 |  |  |  |  |  |  |  |  |
| CO2 (mL/d) | 0.023 | -0.539* | -0.762*** | -0.469 |  |  |  |  |  |  |  |
| N2O (mL/d) | -0.103 | -0.470 | -0.575* | -0.475 | 0.834*** |  |  |  |  |  |  |
| dOM (%) | 0.200 | 0.269 | 0.102 | 0.288 | -0.283 | -0.216 |  |  |  |  |  |
| EMPS2 | 0.067 | -0.511* | -0.347 | -0.597** | 0.709** | 0.800*** | -0.376 |  |  |  |  |
| Total VFA (mM) | -0.077 | 0.498* | 0.519* | 0.290 | -0.663** | -0.295 | 0.689** | -0.454 |  |  |  |
| Acetate (mM) | -0.225 | -0.018 | 0.173 | -0.532* | 0.196 | 0.508* | 0.343 | 0.388 | 0.459 |  |  |
| Propionate (mM) | 0.227 | 0.309 | 0.216 | 0.440 | -0.488 | -0.210 | 0.800*** | -0.346 | 0.905*** | 0.405 |  |
| Isobutyrate (mM) | 0.257 | 0.517* | 0.606** | 0.427 | -0.832*** | -0.587** | 0.640** | -0.552* | 0.877*** | 0.120 | 0.837*** |
| Butyrate (mM) | 0.049 | 0.472 | 0.355 | 0.597** | -0.717*** | -0.469 | 0.748*** | -0.635** | 0.921*** | 0.155 | 0.906*** |
| Valerate (mM) | 0.376 | 0.339 | 0.119 | 0.814*** | -0.647** | -0.499* | 0.601** | -0.638** | 0.689** | -0.196 | 0.794*** |
| Isovalerate (mM) | 0.080 | 0.679** | 0.769*** | 0.365 | -0.938*** | -0.786*** | 0.410 | -0.700** | 0.721*** | -0.118 | 0.564* |
| Caproate (mM) | -0.284 | 0.514* | 0.426 | 0.562* | -0.758*** | -0.635** | 0.011 | -0.737*** | 0.395 | -0.494 | 0.175 |
| Heptanoate (mM) | -0.284 | 0.514* | 0.426 | 0.563* | -0.758*** | -0.636** | 0.012 | -0.737*** | 0.395 | -0.494 | 0.175 |
| Ethanol (mM) | 0.301 | -0.565* | -0.705** | -0.110 | 0.711** | 0.547* | 0.129 | 0.561* | -0.360 | 0.285 | -0.032 |
| NH4+ (mM) | -0.035 | 0.428 | 0.122 | 0.834*** | -0.663** | -0.655** | 0.308 | -0.835*** | 0.441 | -0.513* | 0.400 |
| Formate (mM) | 0.365 | 0.058 | 0.311 | 0.596** | -0.676** | -0.692** | 0.138 | -0.573* | 0.196 | -0.576* | 0.206 |
| Propanol (mM) | 0.585* | -0.021 | -0.353 | 0.760*** | -0.185 | -0.202 | 0.546* | -0.256 | 0.303 | -0.184 | 0.615** |

1 * *P* ≤ 0.10, ** *P* ≤ 0.05, *** *P* ≤ 0.01

2 Efficiency of microbial protein synthesis expressed as grams microbial N produced per kilogram OM fermented

Table 1 (end): Correlation matrix between rumen fermentation variables affected by methane inhibitors using a rumen simulation technique. Statistical levels were adjusted with the false discovery rate option.

| Item1 | Isobutyrate (mM) | Butyrate (mM) | Valerate (mM) | Isovalerate (mM) | Caproate (mM) | Heptanoate (mM) | Ethanol (mM) | NH4+ (mM) | Formate (mM) |
| --- | --- | --- | --- | --- | --- | --- | --- | --- | --- |
| Butyrate (mM) | 0.900*** |  |  |  |  |  |  |  |  |
| Valerate (mM) | 0.813*** | 0.870*** |  |  |  |  |  |  |  |
| Isovalerate (mM) | 0.901*** | 0.748*** | 0.670** |  |  |  |  |  |  |
| Caproate (mM) | 0.473 | 0.515* | 0.546* | 0.683** |  |  |  |  |  |
| Heptanoate (mM) | 0.473 | 0.516* | 0.547* | 0.683** | 1.000*** |  |  |  |  |
| Ethanol (mM) | -0.439 | -0.316 | -0.269 | -0.719*** | -0.856*** | -0.856*** |  |  |  |
| NH4+ (mM) | 0.546* | 0.696** | 0.771*** | 0.613** | 0.838*** | 0.838*** | -0.516* |  |  |
| Formate (mM) | 0.494 | 0.383 | 0.630** | 0.559* | 0.593** | 0.593** | -0.428 | 0.552* |  |
| Propanol (mM) | 0.445 | 0.550* | 0.746*** | 0.182 | 0.037 | 0.038 | 0.353 | 0.456 | 0.375 |

1 * *P* ≤ 0.10, ** *P* ≤ 0.05, *** *P* ≤ 0.01

Figure 1: In vitro (rumen simulation technique) effect of a control treatment (CON) and nitrate (NIT), 3-nitrooxypropanol (NOP) and anthraquinone (AQ) on the relationship between gaseous H2 and CH4 production.
